# Supplementary material for: Insights Into miRNA-mRNA Regulatory Mechanisms of Cold Adaptation in Gymnocypris eckloni: Ubiquitin-Mediated Proteolysis Is Pivotal for Adaptive Energy Metabolism
Source: Front Genet. 2022 Jul 22;13:903995. doi: 10.3389/fgene.2022.903995 (PMC9354851; doi:10.3389/fgene.2022.903995)
Supplement: Supplementary file 2 [file Table1.docx]

Insights into miRNA-mRNA regulatory mechanisms of cold adaptation in *Gymnocypris eckloni*: Ubiquitin-mediated proteolysis is pivotal for adaptive energy metabolism

Miaomiao Nie1, Weilin Ni1, Lihan Wang1, Qiang Gao, Dan Liu1, Fei Tian2, Zhenji Wang3, Cunfang Zhang1, Delin Qi1∗

1State Key Laboratory of Plateau Ecology and Agriculture, Qinghai University, Xining 810016, China. 2 Key Laboratory of Adaptation and Evolution of Plateau Biota, Northwest Institute of Plateau Biology, Chinese Academy of Sciences, Xining 810001, China. 3Fishery Environmental Monitoring Station of Qinghai Province, Xining, 810012, China

* **Correspondence:**

Corresponding Author: Delin Qi, delinqi@126.com

**Table S1** Genes and specific primers used for qPCR

**Table S2** Data output quality list of mRNAs

**Table S3** Data output quality list of small RNA

**Table S4** The DEMs of LTL vs. CTL

**Table S5** Integrated analysis of DEMs and DEGs

**Table S6** miRNA-mRNA and the relative pathway

Table S1 Genes and specific primers used for qPCR

| Gene Name | | Sequence (5’--3’) |
| --- | --- | --- |
| *SPAM1* | -F | AATTCCAGCAAGAAGCCAGA |
| -R | TGCTTCCACTCACAGAAACG |
| *GYS2* | -F | CCTGCCAAAACCAACAACTT |
| -R | TTGCATAAATGGCCCTCTTC |
| *STS* | -F | GGATTCGGATACCAGGGATT |
| -R | TGTTCAGAACGCTCCACTTG |
| *ApoB* | -F | CGGAGACTCTGGACTTGAGG |
| -R | TCCATGCCAATCTCAATGAA |
| *SLC16A7* | -F | CCCCAAATCCCTTACCATCT |
| -R | AATGGTGGTGCCAAAAGAAG |
| *HSP70* | -F | CAACGGCAGAGACTTGAACA |
| -R | AGGTCTGGGTCTGTTTGGTG |
| *eIF4E* | -F | AATAAGACGGCCAGTGACCA |
| -R | GCCTCCAGTTGCATTCACAA |
| *HSP40* | -F | CTGGGGATAAAGAAAGGCGC |
| -R | TGAAATTACCACCTCCGCCT |
| *ATP1B* | -F | ATGACGATGGAGTGCAGGAC |
| -R | GGCAGATACCCGAGAATCCG |
| *β-actin* | -F | GAACCCCAAGGCTAACAGAGAA |
| -R | AGGCATACAGGGACAGCACA |

Table S2 Data output quality list of mRNA

| Sample | Raw Reads | Clean reads | Clean bases | Error (%) | Q20 (%) | Q30 (%) | Total map |
| --- | --- | --- | --- | --- | --- | --- | --- |
| LTL1 | 45204270 | 43433084 | 6.51G | 0.02 | 98.78 | 96.01 | 34518537(74.75%) |
| LTL2 | 44660010 | 42804320 | 6.42G | 0.02 | 98.81 | 96.08 | 33368407(74.26%) |
| LTL3 | 45921590 | 44146328 | 6.62G | 0.02 | 98.66 | 95.58 | 31148339(74.73%) |
| CTL1 | 48286210 | 46177656 | 6.93G | 0.02 | 98.75 | 95.94 | 33934113(78.13%) |
| CTL2 | 48123310 | 44936728 | 6.74G | 0.02 | 98.77 | 95.95 | 32228330(75.29%) |
| CTL3 | 44434438 | 41682858 | 6.25G | 0.02 | 98.84 | 96.16 | 33879021(76.74%) |

Q20/Q30: the percentage of base, whose Phred values greater than 20 / 30; Qphred=-10log10(e).

Table S3 Data output quality list of small RNA

| Sample | Total reads | Clean reads | Bases (G) | Error rate (%) | Q20 (%) | Q30 (%) | GC (%) |
| --- | --- | --- | --- | --- | --- | --- | --- |
| LTL1 | 12530340 (100.00%) | 12213328 (97.47%) | 0.627 | 0.01 | 99.46 | 97.81 | 49.77 |
| LTL2 | 12574236 (100.00%) | 12255222 (97.46%) | 0.629 | 0.01 | 99.21 | 97.01 | 49.65 |
| LTL3 | 11694182 (100.00%) | 10806187 (92.41%) | 0.585 | 0.01 | 99.43 | 97.79 | 50.21 |
| CTL1 | 11322141 (100.00%) | 10319076 (91.14%) | 0.566 | 0.01 | 99.50 | 97.96 | 50.16 |
| CTL2 | 12850052 (100.00%) | 12490489 (97.20%) | 0.643 | 0.01 | 99.50 | 97.97 | 50.34 |
| CTL3 | 11578295 (100.00%) | 10352581 (89.41%) | 0.579 | 0.01 | 99.42 | 97.63 | 50.19 |
